# Supplementary material for: Application of PDCA Cycle Management for Postgraduate Medical Students During the COVID-19 Pandemic
Source: Research Square preprint supplement (doi:10.21203/rs.3.rs-105412/v1), 2020-11-17
Supplement: Supplementary file 1 [file 03c8d62355b545f94280de63.docx]

Questionnaire Survey

Hello, everyone! In order to further understand your current psychological situation, we specially designed this questionnaire. If you agree to fill in this questionnaire, please answer the following questions. The survey was anonymous. All data are for statistical analysis only. Please feel free to fill in. Thank you for your support!

Question

1、Reacting to the epidemic, I had a self-assessment of my mental state in the past 7 days.

1.Do not feel obvious psychological and mental pressure

2.Have some anxiety or depression, can bear it and adjust themselves, and can now gradually adapt and improve

3.Very anxious or depressed, does not continue to alleviate, seriously affects the normal study and work

Hello, everyone! In order to understand the situation of tutor guiding graduate students, we specially designed this questionnaire. If you agree to fill in this questionnaire, please answer the following questions. The survey was anonymous. All data are for statistical analysis only. Please feel free to fill in. Thank you for your support!

Question

1、The frequency of tutor guiding graduate students

1. more than 2 times a week

2. Once a week

3. Less than once a week

2、What are the methods of tutor guidance (multiple choice)

1. Wechat (graphic information)

2. Telephone

3. Online voice

4. Video chat

5. E-mail
